# Supplementary material for: Sox2 induces GBM cell stemness and tumor propagation by repressing TET2 and deregulating 5hmC and 5mC DNA modifications
Source: Research Square preprint supplement (doi:10.21203/rs.3.rs-537465/v1), 2021-05-19

**Sox2 induces GBM cell stemness and tumor propagation by repressing TET2 and deregulating 5hmC and 5mC DNA modifications**

*Hernando Lopez-Bertoni*1,2, Amanda Johnson1,2, Yuan Rui3, Bachchu Lal1,2,Johnathan Coulter4, Maria Lugo-Fagundo1, Sweta Shudir1, Harmon Khela1, Christopher Caputo1, Jordan J. Green 3,5,6,8,9 and John Laterra*1,2,6,7*

1Hugo W. Moser Research Institute at Kennedy Krieger, 2Department of Neurology, Johns Hopkins University School of Medicine, 3Department of Biomedical Engineering, Institute for NanoBioTechnology, and the Translational Tissue Engineering Center, Johns Hopkins University School of Medicine. 4The Department of Radiation Oncology and Molecular Radiation Sciences, The Johns Hopkins University School of Medicine, Baltimore, MD, USA.5Department of Ophthalmology, Johns Hopkins University School of Medicine. 6Department of Oncology, Johns Hopkins University School of Medicine. 7Department of Neuroscience, Johns Hopkins University School of Medicine. 8Departments of Materials Science & Engineering and Chemical & Biomolecular Engineering, Johns Hopkins University. 9Department of Neurosurgery, Johns Hopkins University School of Medicine.

**Running Title:** SOX2-mediated 5hmC dysregulation in GBM Stem Cells

Corresponding Authors:

*John Laterra, M.D., Ph.D.*, Hugo W. Moser Research Institute at Kennedy Krieger, 707 North Broadway, Baltimore, MD 21205. [Laterra@kennedykrieger.org](mailto:Laterra@kennedykrieger.org)

*Hernando Lopez-Bertoni, Ph.D.*, Hugo W. Moser Research Institute at Kennedy Krieger, 707 North Broadway, Baltimore, MD 21205. [Lopezbertoni@kennedykrieger.org](mailto:Lopezbertoni@kennedykrieger.org)

**Keywords:** miRNAs, cancer stem cells, nanomedicine, epigenetics, GBM

**SUPPLEMENTAL MATERIALS:**

| **Supplemental Table S1: PCR primers used to amplify pre-miRNAs** | | |
| --- | --- | --- |
| **Gene** | **Forward primer (5’ to 3’)** | **Reverse primer (5’ to 3’)** |
| miR-10b-5p | TACCCTGTAGATCCGAATTTGTG | ATTCCCCTAGATACGAATTTGTGA |
| U6 | CTCGCTTCGGCAGCACA | AACGCTTCACGAATTTGCGT |

| **Supplemental Table S2: PCR primers used for qRT-PCR** | | |
| --- | --- | --- |
| **Gene** | **Forward primer (5’ to 3’)** | **Reverse primer (5’ to 3’)** |
| Dnmt1  (NM_001130823) | AAGACAAAGACCAGGATGAGAAG | GGGTGTTGGTTCTTTGGTTTG |
| Dnmt3a  (NM_022552) | TATTGATGAGCGCACAAGAGAGC | GGGTGTTCCAGGGTAACATTGAG |
| Dnmt3b  (NM_006892) | CCATTCGAGTCCTGTCATTG | GCAATGGACTCCTCACACAC |
| TET1 (NM_030625) | GAGCCTGTTCCTCGATGTGG | CAAACCCACCTGAGGCTGTT |
| TET2  (NM_017628) | CACTGCATGTTTGGACTTCTG | TGCTCATCCTCAGGTTTTCC |
| 18S | ACAGGATTGACAGATTGATAGCTC | CAAATCGCTCCACCAACTAAGAA |

| **Supplemental Table S3: PCR primers used for ChIP-PCR** | | |
| --- | --- | --- |
| **Gene** | **Forward primer (5’ to 3’)** | **Reverse primer (5’ to 3’)** |
| miR-10b-ChIP2 | gcagtctgcctttgtgttga | aaccagctgcctgtttttgt |
| Detect Sox2 binding to miR-10b-5p promoter – **Sox2 binding site** | | |

| **Supplemental Table S4: PCR primers used for luciferase construct** | | |
| --- | --- | --- |
| **Gene** | **Forward primer (5’ to 3’)** | **Reverse primer (5’ to 3’)** |
| Sox2-miR10b luc for. | CCATGGCTCGAGgcagtctgcctttgtgttga | C CCATGGAGATCTaaccagctgcctgtttttgt |
| miR-10b-5p promoter region containing the Sox2 binding sites was cloned the XhoI and BglII sites of the pGL4.2 luciferase reporter vector (Promega, Madison, WI - USA). | | |

| **Supplemental Table S5: Lentiviral constructs** | | |
| --- | --- | --- |
| **Genecopoeia** | | |
| **Gene** | **Accession #** | **Catalog #** |
| miR-10b-5p mimic | MIMAT0000254 | HmiR0035-MR03 |
| miR-10b-5p Inhibitor | MIMAT0000254 | HmiR-AN0034-AM03 |
| miRNA scrambled control clone for pEZX-MR03 |  | CmiR0001-MR03 |
| **Lentiviral shRNA constructs – Applied Biological Materials Inc. (abm)** | | |
| **Gene** | **Accession #** | **Catalog #** |
| Scrambled siRNA GFP Lentivector |  | LV015-G |
| TET2-425 siRNA/shRNA/RNAi Lentivector (Human)  Set of 4 shRNAs | 465200910495 | NM_017628 |

| **Supplemental Table S6: Antibodies** | | |
| --- | --- | --- |
| **Gene** | **Company (Cat.#)** | **Dilution** |
| Tet2 | Bethyl Laboratories, Inc (A304-247A) | 1:250 |
| DNMT3a | Cell Signaling ( 3598 ) | 1:1000 |
| 5mC | Cell Signaling (28692S) | 1:3000 |
| 5hmC | Active motif (39791) | 1:1000 |
| dsDNA | Abcam (ab27156) | 1:1000 |
| Actin | Sigma-Millipore (A1978) | 1:5000 |
| IRDye 800CW Goat anti Rabbit | Li-Cor (926-32211) | 1:10000 |
| IRDye® 680RD Goat anti-Mouse | Li-Cor (926-68070) | 1:10000 |

**SUPPLEMENTAL FIGURES:**


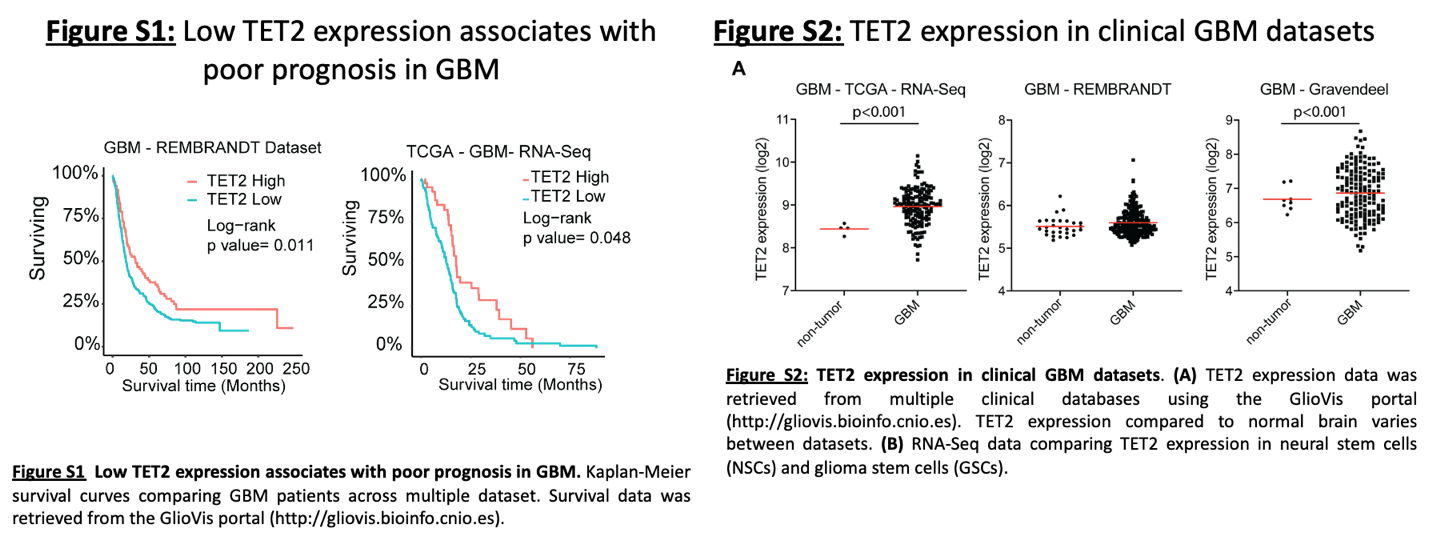


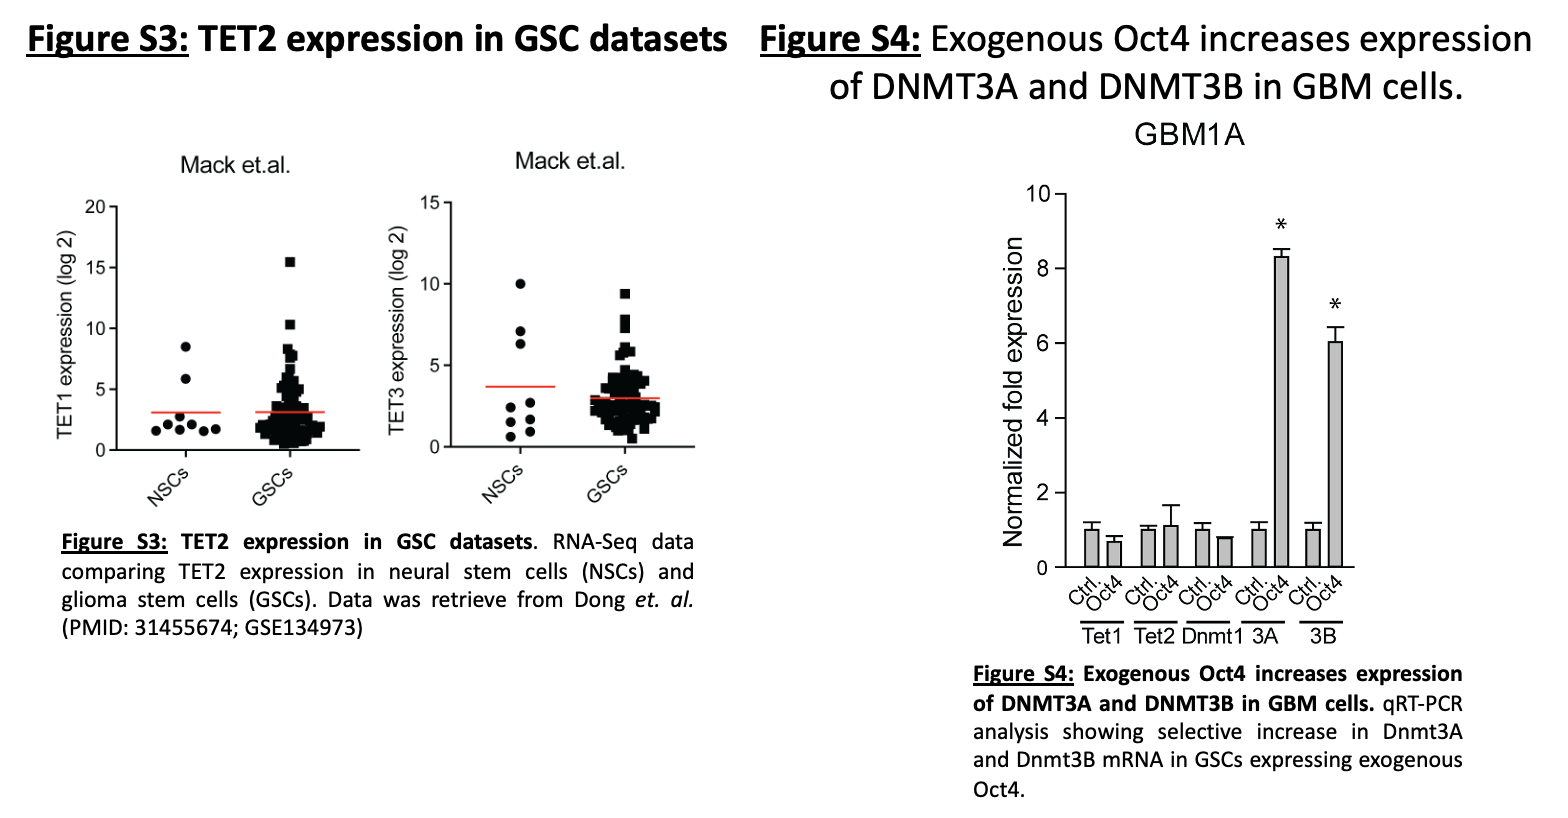


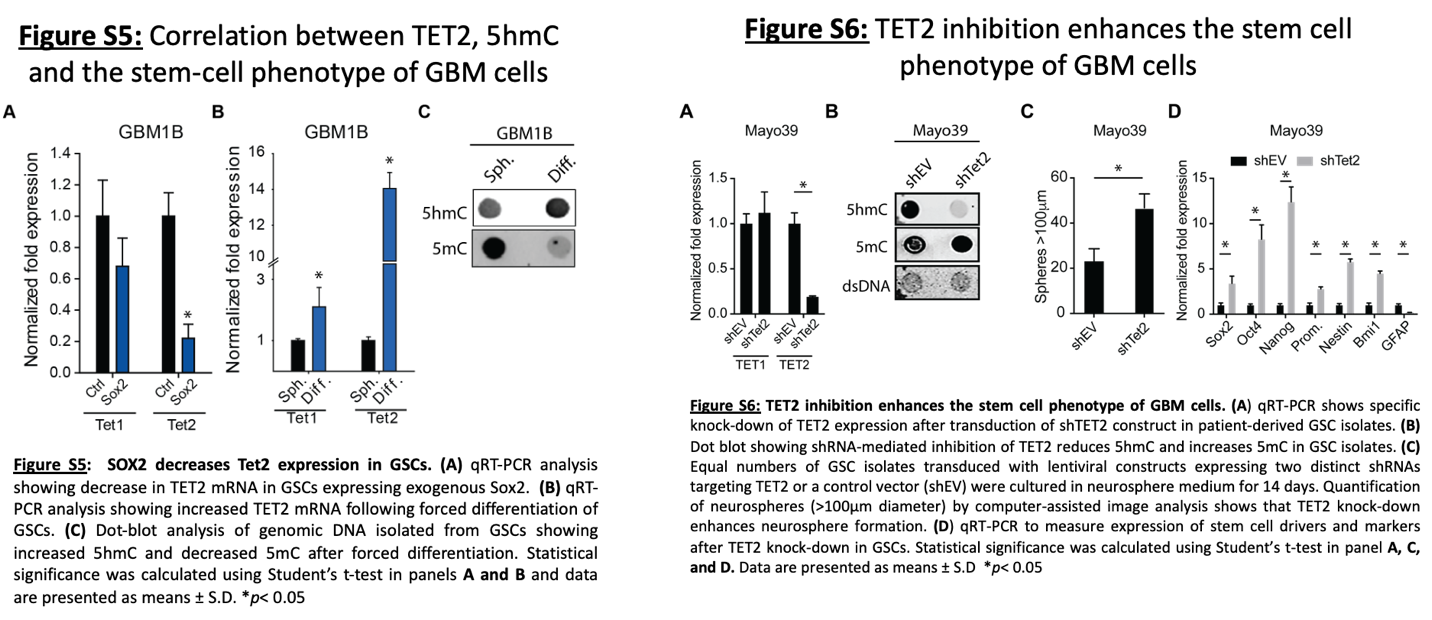


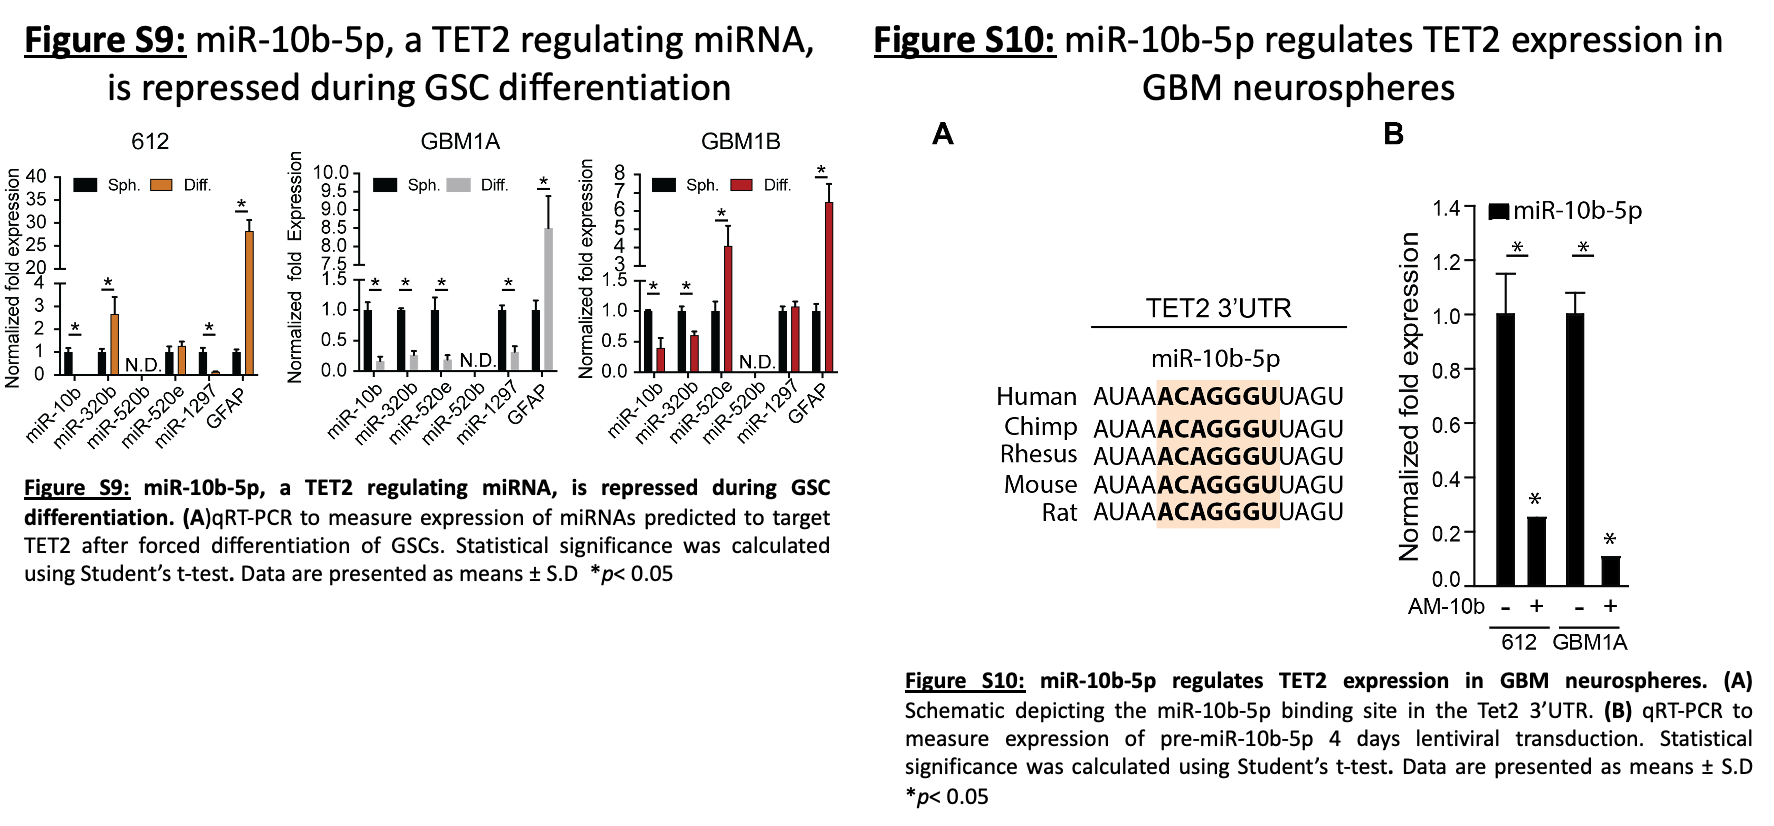

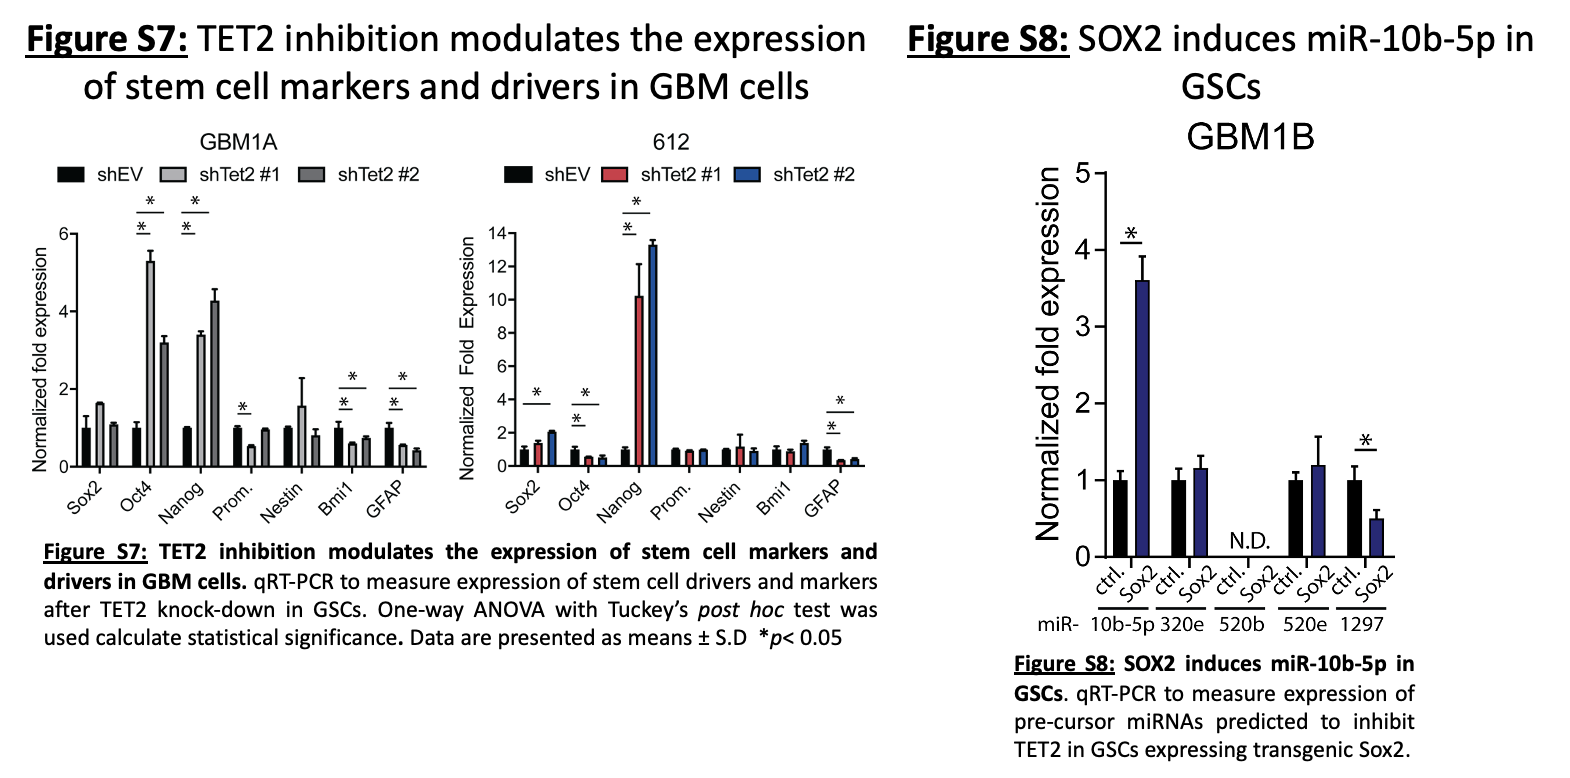


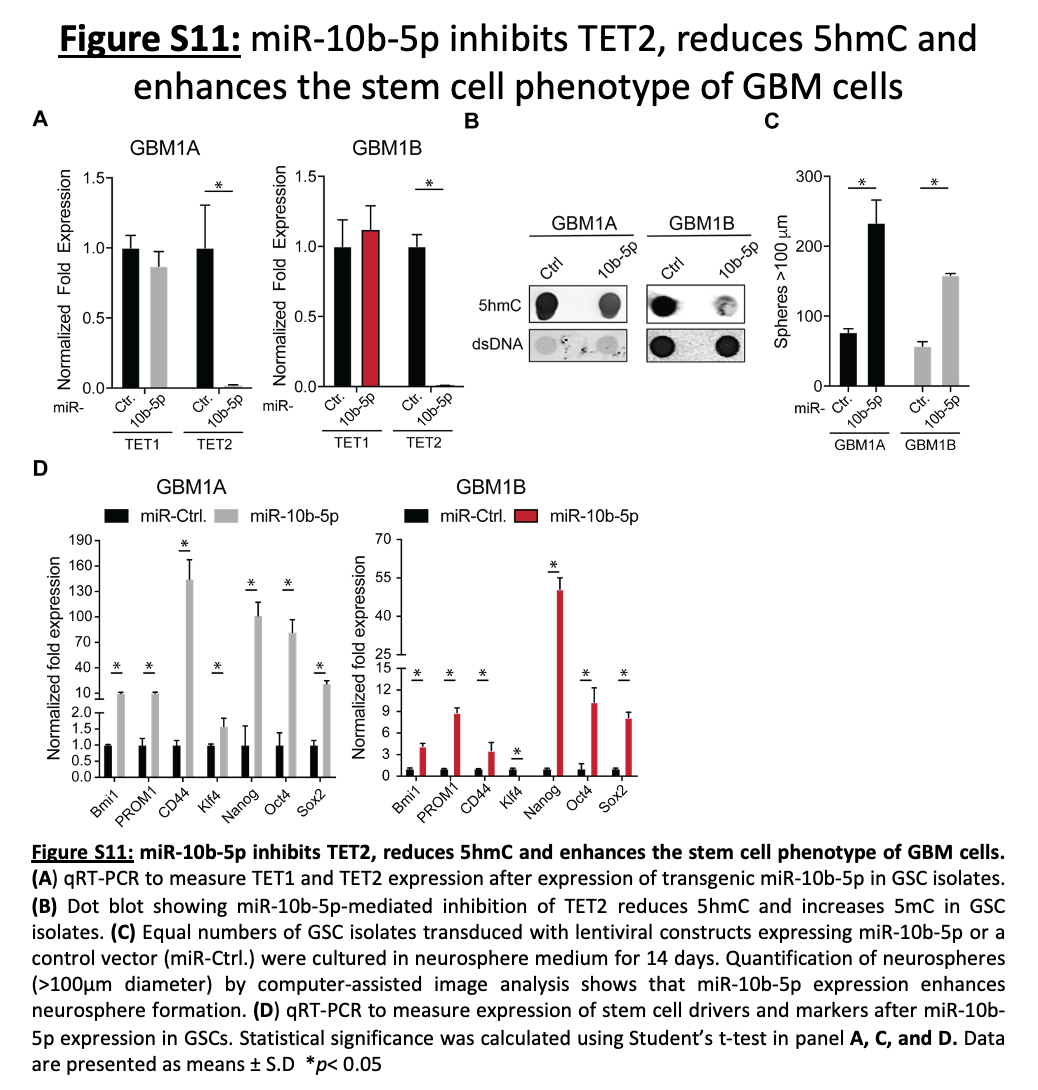


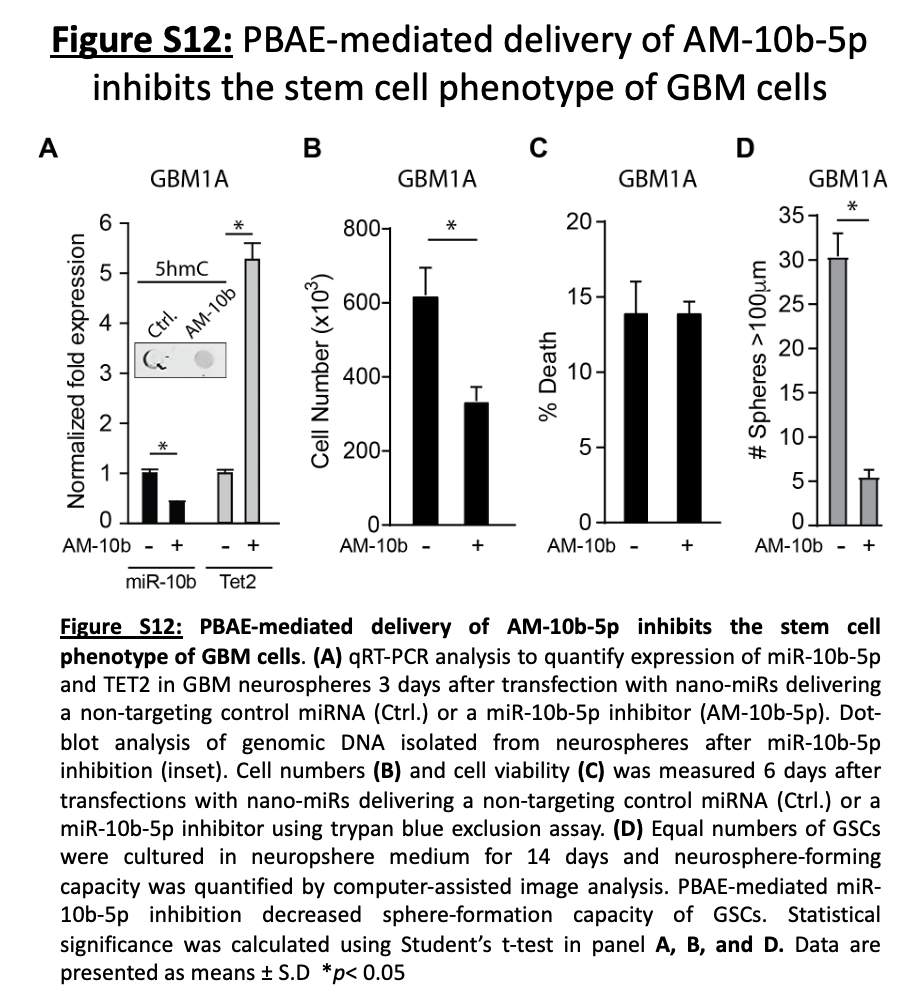

Supplement: Supplementary file 1 [file 3fbcd0351fbe62d0ca8a9ded.docx]
